# Supplementary material for: Characterization of the Evolutionary Pressure on Anisodus tanguticus Maxim. with Complete Chloroplast Genome Sequence
Source: MDPI journal article supplement (doi:10.3390/genes13112125), 2022-11-15
Supplement: s1 [file s1]

**Table S4** The Ka/Ks ratios of protein-coding genes of *A. tanguticus* and related species.

|         | MW246825    | MW246825     | MW246825    | MW246825     | MW246825    |
|---------|-------------|--------------|-------------|--------------|-------------|
|         | vs.KY352315 | vs.NC_030282 | vs.KF248009 | vs.NC_018117 | vs.Z00044.2 |
| Gene    | Ka/Ks       | Ka/Ks        | Ka/Ks       | Ka/Ks        | Ka/Ks       |
| rps2    | 0           | 0            | 0           | 0            | 0           |
| rpoC2   | 0.421804    | 1.10328      | 0.235299    | 0.359902     | 0.437101    |
| rpoC1   | 0.204631    | 0.102195     | 0.117028    | 0.025608     | 0.057446    |
| rpoB    | 0.310762    | 0.227431     | 0           | 0.04752      | 0.125967    |
| petN    | NA          | -            | 0           | NA           | -           |
| psbM    | NA          | NA           | NA          | NA           | NA          |
| psbD    | NA          | 0            | 0           | 0.06301      | 0           |
| psbC    | 0.143108    | 0            | 0           | 0.091887     | 0.081891    |
| psbZ    | NA          | NA           | NA          | 0            | -           |
| rps14   | NA          | NA           | 0           | 0.215481     | 0.43787     |
| psbA    | 0           | NA           | 0           | 0.081657     | 0           |
| psaB    | 0           | 0            | 0           | 0.044673     | 0.090378    |
| psaA    | 0           | 0            | 0           | 0.049308     | 0           |
| ycf3    | NA          | NA           | 0.284072    | 0.101773     | 0.404783    |
| rps4    | 0.195143    | 0.196109     | 0           | 0            | 0.066805    |
| ndhJ    | 0           | 0.201807     | NA          | 0            | 0           |
| ndhK    | 0.442288    | 0.400158     | 0.171968    | 0.265933     | 0.555537    |
| ndhC    | 0           | 0            | 0           | 0            | 0.061499    |
| atpE    | 0           | 0            | NA          | 0.769889     | 0.236214    |
| atpB    | 0           | 0            | 0.114754    | 0.124406     | 0.132882    |
| rbcL    | 0.071828    | 0.186272     | 0.173633    | 0.184738     | 0.080612    |
| matK    | 0.461916    | 0.370966     | 0.823365    | 0.421164     | 0.325497    |
| accD    | 0.922732    | NA           | 0.674031    | 0.666601     | 0.47603     |
| psaI    | NA          | NA           | NA          | 0.741555     | 0           |
| ycf4    | NA          | NA           | 0           | 0.435312     | 0.88838     |
| cemA    | 1.15724     | 1.64322      | 0.373983    | 0.49684      | -           |
| petA    | 0.110431    | 0.10281      | 0.083376    | 0.161123     | 0.16937     |
| psbJ    | NA          | NA           | NA          | NA           | 0           |
| psbL    | NA          | 0            | NA          | NA           | NA          |
| psbF    | NA          | -            | NA          | NA           | NA          |
| psbE    | NA          | NA           | 0           | NA           | 0           |
| petL    | 0           | 0            | 0           | 0            | 0           |
| rps16   | 0.706971    | 0            | 0.515065    | 0            | 0.179076    |
| petG    | NA          | NA           | NA          | NA           | NA          |
| psaJ    | 0           | 0            | 0           | 0            | 0           |
| rpl33   | NA          | 0            | 0.092898    | 0            | 0           |
| rps18   | NA          | 0            | NA          | 0.794666     | 0           |
| rpl20   | 0           | 0            | NA          | 0.207893     | 0           |
| rps12-2 | NA          | NA           | 0.91934     | 0.673367     | -           |
| clpP    | 1.77581     | 0.315903     | 0.088729    | 1.07052      | 0.990664    |

|         |          |          |          |          |          |
|---------|----------|----------|----------|----------|----------|
| psbB    | 0.024325 | 0        | 0        | 0        | 0        |
| psbT    | NA       | -        | NA       | NA       | NA       |
| psbN    | NA       | NA       | 0        | NA       | NA       |
| psbK    | NA       | NA       | NA       | NA       | 0.290055 |
| psbH    | NA       | 0        | NA       | 0        | 0        |
| petB    | 0.253035 | 0        | 0.035418 | 0        | 0.083467 |
| petD    | 0.258099 | NA       | 0        | 0        | 0        |
| rpoA    | 0.455228 | 0.175617 | 0.276646 | 0.329624 | 0.351181 |
| rps11   | 0        | 0        | 0        | 0        | 0        |
| rpl36   | NA       | NA       | NA       | 0        | NA       |
| rps8    | 0.225143 | 0        | 0.106281 | 0.260703 | -        |
| rpl14   | 0        | 0        | 0        | 0.431397 | -        |
| rps3    | 0.863572 | 0.410814 | 0.177797 | 0.225246 | -        |
| rpl22   | 0        | 0.283013 | 0.271355 | 0        | -        |
| psbI    | 0.318592 | NA       | NA       | NA       | NA       |
| rps19   | 0.176059 | 0.134009 | 0        | 0.410053 | -        |
| rpl2    | NA       | 0        | 0        | 0        | -        |
| rpl23-2 | NA       | NA       | NA       | NA       | -        |
| ycf2-2  | NA       | 0.94969  | 0.637284 | 0.934446 | -        |
| ycf15-2 | NA       | NA       | NA       | NA       | -        |
| ndhB-2  | NA       | NA       | NA       | 0        | -        |
| rps7-2  | NA       | NA       | NA       | NA       | -        |
| rps12-2 | NA       | NA       | 0.91934  | 0.673367 | -        |
| ycf1    | 0.7523   |          | 0.489888 | 0.630553 | -        |
| ndhF    | 0.502659 | 0.687063 | 0.195571 | 0.260442 | -        |
| atpA    | 0.143906 | 0        | 0        | 0.062778 | 0.086712 |
| rpl32   | 0.231094 | NA       | NA       | 0.32455  | -        |
| ccsA    | 0.179208 | 0.489156 | 0.119386 | 0.15908  | -        |
| ndhD    | 0.122138 | 0.187358 | 0.130972 | 0.128025 | -        |
| psaC    | 0        | NA       | 0        | 0        | -        |
| ndhE    | 0.21503  | 0.21503  | 0        | 0        | -        |
| ndhG    | 0.622001 | 0.479522 | 0.201528 | 0.156023 | -        |
| ndhI    | 0        | 0.099831 | 0.19127  | 0.098341 | -        |
| ndhA    | 0.254773 | 0.537279 | 0.146094 | 0.451121 | -        |
| ndhH    | 0.132674 | 0.13348  | 0.029979 | 0.021385 | -        |
| rps15   | 0        | 0        | 0.148712 | 0.254474 | -        |
| atpF    | 0.106145 | 0.766595 | 0.106145 | 0.082304 | 0.383693 |
| ycf1    | 0.414409 | 0.48198  | 0.508044 | 0.767555 | -        |
| rps7-2  | NA       | NA       | NA       | NA       | -        |
| ndhB-2  | NA       | NA       | NA       | 0        | -        |
| ycf15-2 | NA       | NA       | NA       | NA       | -        |
| ycf2-2  | NA       | 0.94969  | 0.637284 | 0.934446 | -        |
| rpl23-2 | NA       | NA       | NA       | NA       | -        |
| rpl2    | NA       | 0        | 0        | 0        | -        |

|      |          |         |          |         |          |
|------|----------|---------|----------|---------|----------|
| atpH | 0        | NA      | NA       | NA      | 0.158646 |
| atpI | 0.091426 | 0.09189 | 0.111249 | 0.09189 | 0.075321 |
