# Supplementary material for: Characterization of the Evolutionary Pressure on Anisodus tanguticus Maxim. with Complete Chloroplast Genome Sequence
Source: MDPI journal article supplement (doi:10.3390/genes13112125), 2022-11-15
Supplement: s1 [file s1]

**Table S5** The chloroplast genome of plant species for construction phylogenetic tree.

| Genbank number | species                                    | Cp genome length |
|----------------|--------------------------------------------|------------------|
| NC_030185.1    | <i>Acnistus arborescens</i>                | 156898 bp        |
| KR078312.1     | <i>Capsicum frutescens</i>                 | 156817 bp        |
| NC_018117.1    | <i>Datura stramonium</i>                   | 155871 bp        |
| NC_030171.1    | <i>Eriolarynx fasciculata</i>              | 157025 bp        |
| NC_029833.1    | <i>Ioichroma australe</i>                  | 156996 bp        |
| KF248009.1     | <i>Hyoscyamus niger</i>                    | 155720 bp        |
| NC_029833.1    | <i>Ioichroma Australe</i>                  | 156996 bp        |
| NC_030177.1    | <i>Ioichroma ellipticum</i>                | 157052 bp        |
| NC_030168.1    | <i>Ioichroma salpoanum</i>                 | 156971 bp        |
| NC_007500.1    | <i>Nicotiana sylvestris</i>                | 155941 bp        |
| Z00044.2       | <i>Nicotiana tabacum</i>                   | 155943 bp        |
| NC_016068.1    | <i>Nicotiana undulata</i>                  | 155863 bp        |
| DQ347958.1     | <i>Solanum bulbocastanum</i> cultivar PT29 | 155371 bp        |
| NC_028070.2    | <i>Solanum nigrum</i>                      | 155432 bp        |
| NC_030282.1    | <i>Scopolia parviflora</i>                 | 156193 bp        |
| NC_007898.3    | <i>Solanum lycopersicum</i>                | 155461 bp        |
| KP331414.1     | <i>Solanum lycopersicum</i> IPA-6          | 155605 bp        |
| DQ231562.1     | <i>Solanum tuberosum</i>                   | 155312 bp        |
| KY352315.1     | <i>Przewalskia tangutica</i>               | 155570 bp        |
| MW246825.1     | <i>Anisodus tanguticus</i>                 | 155765 bp        |
| KT428154       | <i>Scrophularia dentata</i>                | 152553 bp        |
