# Supplementary material for: Characterization of the Evolutionary Pressure on Anisodus tanguticus Maxim. with Complete Chloroplast Genome Sequence
Source: MDPI journal article supplement (doi:10.3390/genes13112125), 2022-11-15
Supplement: s1 [file s1]

**Table S1 The codon usage and codon-anticodon recognition pattern for the *A. tanguticus* cp genome.**

| Amino acid | Codon | Number | RSCU   | tRNA     | Amino acid | Codon | Number | RSCU   | tRNA     |
|------------|-------|--------|--------|----------|------------|-------|--------|--------|----------|
| Ter        | UAA   | 46     | 1.5861 |          | Met        | AUG   | 631    | 1.9936 | trnM-CAU |
| Ter        | UAG   | 23     | 0.7932 |          | Met        | GUG   | 2      | 0.0064 |          |
| Ter        | UGA   | 18     | 0.6207 |          | Met        | UUG   | 0      | 0      |          |
| Ala        | GCA   | 397    | 1.1272 | trnA-UGC | Asn        | AAC   | 312    | 0.4674 | trnN-GUU |
| Ala        | GCC   | 248    | 0.704  |          | Asn        | AAU   | 1023   | 1.5326 |          |
| Ala        | GCG   | 133    | 0.3776 |          | Pro        | CCA   | 333    | 1.1756 | trnP-UGG |
| Ala        | GCU   | 631    | 1.7912 |          | Pro        | CCC   | 201    | 0.7096 |          |
| Cys        | UGC   | 83     | 0.5442 | trnC-GCA | Pro        | CCG   | 156    | 0.5508 |          |
| Cys        | UGU   | 222    | 1.4558 |          | Pro        | CCU   | 443    | 1.564  |          |
| Asp        | GAC   | 220    | 0.4048 | trnD-GUC | Gln        | CAA   | 722    | 1.4994 | trnQ-UUG |
| Asp        | GAU   | 867    | 1.5952 |          | Gln        | CAG   | 241    | 0.5006 |          |
| Glu        | GAA   | 1060   | 1.495  | trnE-UUC | Arg        | AGA   | 491    | 1.8138 | trnR-UCU |
| Glu        | GAG   | 358    | 0.505  |          | Arg        | AGG   | 175    | 0.6468 |          |
| Phe        | UUC   | 541    | 0.7082 | trnF-GAA | Arg        | CGA   | 390    | 1.4406 |          |
| Phe        | UUU   | 987    | 1.2918 |          | Arg        | CGC   | 100    | 0.3696 |          |
| Gly        | GGA   | 735    | 1.5928 | trnG-UCC | Arg        | CGG   | 120    | 0.4434 |          |
| Gly        | GGC   | 204    | 0.442  | trnG-GCC | Arg        | CGU   | 348    | 1.2858 | trnR-ACG |
| Gly        | GGG   | 323    | 0.7    |          | Ser        | AGC   | 122    | 0.3486 | trnS-GCU |
| Gly        | GGU   | 584    | 1.2656 |          | Ser        | AGU   | 423    | 1.2078 |          |
| His        | CAC   | 145    | 0.464  | trnH-GUG | Ser        | UCA   | 424    | 1.2108 | trnS-UGA |
| His        | CAU   | 480    | 1.536  |          | Ser        | UCC   | 337    | 0.9624 | trnS-GGA |
| Ile        | AUA   | 700    | 0.9279 |          | Ser        | UCG   | 193    | 0.5514 |          |
| Ile        | AUC   | 452    | 0.5991 | trnI-GAU | Ser        | UCU   | 602    | 1.719  |          |
| Ile        | AUU   | 1111   | 1.4727 | trnI-CAU | Thr        | ACA   | 407    | 1.1908 | trnT-UGU |
| Lys        | AAA   | 1075   | 1.4828 | trnK-UUU | Thr        | ACC   | 280    | 0.8192 | trnT-GGU |
| Lys        | AAG   | 375    | 0.5172 |          | Thr        | ACG   | 154    | 0.4508 |          |
| Leu        | CUA   | 374    | 0.7824 | trnL-UAG | Thr        | ACU   | 526    | 1.5392 |          |
| Leu        | CUC   | 212    | 0.4434 |          | Val        | GUA   | 543    | 1.4848 | trnV-UAC |
| Leu        | CUG   | 201    | 0.4206 |          | Val        | GUC   | 187    | 0.5112 | trnV-GAC |
| Leu        | CUU   | 622    | 1.302  |          | Val        | GUG   | 201    | 0.5496 |          |
| Leu        | UUA   | 879    | 1.8396 | trnL-UAA | Val        | GUU   | 532    | 1.4544 |          |
| Leu        | UUG   | 579    | 1.212  | trnL-CAA | Tyr        | UAC   | 190    | 0.3866 |          |
| Trp        | UGG   | 483    | 1      | trnW-CCA | Tyr        | UAU   | 793    | 1.6134 | trnY-GUA |

**RSCU: Relative synonymous Codon Usage; Ter : terminal codon**
