# Supplementary material for: Characterization of the Evolutionary Pressure on Anisodus tanguticus Maxim. with Complete Chloroplast Genome Sequence
Source: MDPI journal article supplement (doi:10.3390/genes13112125), 2022-11-15
Supplement: s1 [file s1]

**Table S2a** Comparison of repeat sequences on *A.tanguticus* and five related species.

| Species             | type | 30-39bp | 40-49bp | 50-59bp | >60bp |
|---------------------|------|---------|---------|---------|-------|
| <i>N.tabacum</i>    | F    | 17      | 1       | 0       | 0     |
|                     | P    | 13      | 2       | 1       | 1     |
|                     | C    | 0       | 0       | 0       | 0     |
|                     | R    | 1       | 0       | 0       | 0     |
| <i>D.stramonium</i> | F    | 12      | 1       | 0       | 0     |
|                     | P    | 10      | 1       | 1       | 1     |
|                     | C    | 0       | 0       | 0       | 0     |
|                     | R    | 0       | 0       | 0       | 0     |
| <i>H.niger</i>      | F    | 14      | 7       | 2       | 0     |
|                     | P    | 11      | 7       | 3       | 1     |
|                     | C    | 0       | 0       | 0       | 0     |
|                     | R    | 0       | 0       | 0       | 0     |
| <i>A.tanguticus</i> | F    | 16      | 2       | 0       | 0     |
|                     | P    | 13      | 3       | 1       | 1     |
|                     | C    | 0       | 0       | 0       | 0     |
|                     | R    | 3       | 0       | 0       | 0     |
| <i>P.tangutica</i>  | F    | 19      | 3       | 1       | 0     |
|                     | P    | 14      | 5       | 0       | 2     |
|                     | C    | 0       | 0       | 0       | 0     |
|                     | R    | 2       | 0       | 0       | 0     |
| <i>S.parviflora</i> | F    | 15      | 4       | 0       | 0     |
|                     | P    | 13      | 5       | 1       | 1     |
|                     | C    | 0       | 0       | 0       | 0     |
|                     | R    | 1       | 0       | 0       | 0     |

*Note:* F: forward repeats; C: complement repeat; R: reverse repeat; P: Palindromic repeat.

**Table S2b** Distribution of SSRs in the *A.tanguticus* cp genome.

| SSR type  | Unit     | Times     | Numbers of SSR |
|-----------|----------|-----------|----------------|
| <b>P1</b> | <b>A</b> | <b>8</b>  | <b>27</b>      |
|           | <b>A</b> | <b>9</b>  | <b>5</b>       |
|           | <b>A</b> | <b>10</b> | <b>5</b>       |
|           | <b>A</b> | <b>11</b> | <b>3</b>       |
|           | <b>A</b> | <b>12</b> | <b>4</b>       |
|           | <b>A</b> | <b>13</b> | <b>1</b>       |
|           | <b>A</b> | <b>17</b> | <b>1</b>       |
|           | <b>C</b> | <b>8</b>  | <b>2</b>       |
|           | <b>G</b> | <b>9</b>  | <b>1</b>       |
|           | <b>T</b> | <b>8</b>  | <b>27</b>      |
|           | <b>T</b> | <b>9</b>  | <b>19</b>      |
|           | <b>T</b> | <b>10</b> | <b>8</b>       |
|           | <b>T</b> | <b>11</b> | <b>7</b>       |

|    |     |    |   |   |
|----|-----|----|---|---|
| P2 | T   | 12 | 2 |   |
|    | T   | 13 | 1 |   |
|    | T   | 14 | 2 |   |
|    | T   | 15 | 1 |   |
|    | T   | 16 | 2 |   |
|    | T   | 17 | 2 |   |
|    | AT  | 5  | 3 |   |
| P3 | AT  | 6  | 1 |   |
|    | TA  | 5  | 3 |   |
|    | TA  | 6  | 1 |   |
|    | AAC | 3  | 2 |   |
|    | AAG | 3  | 4 |   |
|    | AAT | 3  | 5 |   |
|    | AGA | 3  | 3 |   |
|    | ATA | 3  | 3 |   |
|    | ATC | 3  | 1 |   |
|    | ATG | 3  | 1 |   |
|    | ATT | 3  | 3 |   |
|    | CAA | 3  | 1 |   |
|    | CAG | 3  | 2 |   |
|    | CCT | 3  | 1 |   |
|    | CTC | 3  | 1 |   |
|    | CTG | 3  | 1 |   |
|    | CTT | 3  | 2 |   |
|    | GAA | 3  | 2 |   |
|    | GAG | 3  | 1 |   |
|    | GAT | 3  | 1 |   |
|    | GCT | 3  | 1 |   |
|    | GGA |    | 3 | 1 |
|    | GTA |    | 3 | 1 |
|    | GTG |    | 3 | 1 |
|    | GTT |    | 3 | 1 |
|    | TAA |    | 3 | 5 |
|    | TAT |    | 3 | 4 |
|    | TCG |    | 3 | 1 |
|    | TCT |    | 3 | 3 |
|    | TGA |    | 3 | 1 |
|    | TGC |    | 3 | 2 |
|    | TGG |    | 3 | 1 |
|    | TTA |    | 3 | 5 |
|    | TTA |    | 4 | 1 |
|    | TTC |    | 3 | 4 |
|    | TTC |    | 4 | 1 |
|    | TTG |    | 3 | 5 |

|    |       |   |   |
|----|-------|---|---|
| P4 | AAAC  | 3 | 1 |
|    | AAAT  | 3 | 1 |
|    | CAAA  | 3 | 1 |
|    | CTAT  | 3 | 1 |
|    | TTCT  | 3 | 1 |
|    | TTTA  | 3 | 1 |
|    | TTTG  | 3 | 1 |
| P5 | AATTG | 3 | 1 |

---
