# Supplementary material for: Characterization of the Evolutionary Pressure on Anisodus tanguticus Maxim. with Complete Chloroplast Genome Sequence
Source: MDPI journal article supplement (doi:10.3390/genes13112125), 2022-11-15
Supplement: s1 [file s1]

**Table S3 Comparison of nucleotide variability (Pi) among *A.tanguticus* and related species.**

| Region              | Pi      | Total Number of mutations | Region length |
|---------------------|---------|---------------------------|---------------|
| IR.gene1.trnN-GUU   | 0       | 0                         | 72            |
| IR.gene10.rps7      | 0       | 0                         | 468           |
| IR.gene11.ndhB      | 0.00149 | 6                         | 1533          |
| IR.gene12.trnL-CAA  | 0.00412 | 1                         | 81            |
| IR.gene13.ycf15     | 0.00156 | 1                         | 264           |
| IR.gene14.ycf2      | 0.00295 | 56                        | 6894          |
| IR.gene15.trnI-CAU  | 0       | 0                         | 74            |
| IR.gene16.rpl23     | 0.00236 | 2                         | 282           |
| IR.gene17.rpl2      | 0.00438 | 10                        | 828           |
| IR.gene2.trnR-ACG   | 0       | 0                         | 74            |
| IR.gene3.rrn5       | 0       | 0                         | 121           |
| IR.gene4.rrn4.5     | 0       | 0                         | 103           |
| IR.gene5.rrn23      | 0.00095 | 8                         | 2810          |
| IR.gene6.trnA-UGC   | 0       | 0                         | 73            |
| IR.gene7.trnI-GAU   | 0       | 0                         | 77            |
| IR.gene8.rrn16      | 0.00068 | 3                         | 1500          |
| IR.gene9.trnV-GAC   | 0       | 0                         | 72            |
| LSC.gene1.trnH-GUG  | 0       | 0                         | 78            |
| LSC.gene10.trnG-UCC | 0       | 0                         | 74            |
| LSC.gene11.trnR-UCU | 0.00463 | 1                         | 72            |
| LSC.gene12.atpA     | 0.01155 | 47                        | 1524          |
| LSC.gene13.atpF     | 0.00829 | 12                        | 570           |
| LSC.gene14.atpH     | 0.00623 | 4                         | 246           |
| LSC.gene15.atpI     | 0.00654 | 12                        | 744           |
| LSC.gene16.rps2     | 0.00591 | 12                        | 711           |
| LSC.gene17.rpoC2    | 0.01094 | 121                       | 4182          |
| LSC.gene18.rpoC1    | 0.00722 | 41                        | 2067          |
| LSC.gene19.rpoB     | 0.00421 | 37                        | 3213          |
| LSC.gene2.psbA      | 0.00477 | 14                        | 1062          |
| LSC.gene20.trnC-GCA | 0       | 0                         | 72            |
| LSC.gene21.petN     | 0.00741 | 2                         | 192           |
| LSC.gene22.psbM     | 0       | 0                         | 105           |
| LSC.gene23.trnD-GUC | 0.00721 | 1                         | 74            |
| LSC.gene24.trnY-GUA | 0       | 0                         | 84            |
| LSC.gene25.trnE-UUC | 0       | 0                         | 73            |
| LSC.gene26.trnT-GGU | 0       | 0                         | 72            |
| LSC.gene27.psbD     | 0.00414 | 11                        | 1062          |
| LSC.gene28.psbC     | 0.00596 | 21                        | 1422          |
| LSC.gene29.trnS-UGA | 0.00366 | 1                         | 93            |
| LSC.gene3.trnK-UUU  | 0       | 0                         | 74            |
| LSC.gene30.psbZ     | 0.00176 | 1                         | 189           |
| LSC.gene31.trnG-GCC | 0       | 0                         | 71            |

|                     |         |    |      |
|---------------------|---------|----|------|
| LSC.gene32.trnM-CAU | 0       | 0  | 74   |
| LSC.gene33.rps14    | 0.00726 | 6  | 330  |
| LSC.gene34.psaB     | 0.00511 | 32 | 2205 |
| LSC.gene35.psaA     | 0.00571 | 33 | 2253 |
| LSC.gene36.ycf3     | 0.00408 | 5  | 513  |
| LSC.gene37.trnS-GGA | 0.00383 | 1  | 87   |
| LSC.gene38.rps4     | 0.00836 | 12 | 606  |
| LSC.gene39.trnT-UGU | 0       | 0  | 73   |
| LSC.gene4.matK      | 0.01782 | 71 | 1530 |
| LSC.gene40.trnL-UAA | 0.00794 | 2  | 87   |
| LSC.gene41.trnF-GAA | 0.00457 | 1  | 73   |
| LSC.gene42.ndhJ     | 0.00531 | 7  | 477  |
| LSC.gene43.ndhK     | 0.0112  | 20 | 855  |
| LSC.gene44.ndhC     | 0.01286 | 12 | 363  |
| LSC.gene45.trnV-UAC | 0       | 0  | 75   |
| LSC.gene46.trnM-CAU | 0       | 0  | 73   |
| LSC.gene47.atpE     | 0.00829 | 8  | 402  |
| LSC.gene48.atpB     | 0.00762 | 29 | 1497 |
| LSC.gene49.rbcL     | 0.00735 | 28 | 1455 |
| LSC.gene5.rps16     | 0.01731 | 12 | 267  |
| LSC.gene50.accD     | 0.01449 | 60 | 1551 |
| LSC.gene51.psaI     | 0.00901 | 3  | 111  |
| LSC.gene52.ycf4     | 0.00456 | 7  | 555  |
| LSC.gene53.cemA     | 0.01478 | 27 | 690  |
| LSC.gene54.petA     | 0.01011 | 25 | 963  |
| LSC.gene55.psbJ     | 0.00271 | 1  | 123  |
| LSC.gene56.psbL     | 0.0057  | 2  | 117  |
| LSC.gene57.psbF     | 0.00407 | 1  | 182  |
| LSC.gene58.psbE     | 0.00265 | 2  | 252  |
| LSC.gene59.petL     | 0.00903 | 2  | 96   |
| LSC.gene6.trnQ-UUG  | 0       | 0  | 72   |
| LSC.gene60.petG     | 0.00292 | 1  | 114  |
| LSC.gene61.trnW-CCA | 0       | 0  | 74   |
| LSC.gene62.trnP-UGG | 0.01502 | 2  | 74   |
| LSC.gene63.psaJ     | 0.00741 | 3  | 198  |
| LSC.gene64.rpl33    | 0.01095 | 6  | 201  |
| LSC.gene65.rps18    | 0.00719 | 6  | 312  |
| LSC.gene66.rpl20    | 0.00568 | 6  | 387  |
| LSC.gene67.rps12    | 0.031   | 22 | 429  |
| LSC.gene68.clpP     | 0.02732 | 45 | 597  |
| LSC.gene69.psbB     | 0.00742 | 31 | 1527 |
| LSC.gene7.psbK      | 0.00896 | 5  | 186  |
| LSC.gene70.psbT     | 0       | 0  | 139  |
| LSC.gene71.psbN     | 0.00253 | 1  | 141  |

|                    |         |     |      |
|--------------------|---------|-----|------|
| LSC.gene72.psbH    | 0.00841 | 5   | 240  |
| LSC.gene73.petB    | 0.00638 | 11  | 648  |
| LSC.gene74.petD    | 0.00835 | 10  | 483  |
| LSC.gene75.rpoA    | 0.01492 | 41  | 1014 |
| LSC.gene76.rps11   | 0.00368 | 4   | 417  |
| LSC.gene77.rpl36   | 0.00292 | 1   | 123  |
| LSC.gene78.rps8    | 0.01481 | 15  | 405  |
| LSC.gene79.rpl14   | 0.01048 | 11  | 369  |
| LSC.gene8.psbI     | 0.00601 | 2   | 162  |
| LSC.gene80.rpl16   | 0.00593 | 6   | 405  |
| LSC.gene81.rps3    | 0.01136 | 20  | 657  |
| LSC.gene82.rpl22   | 0.02507 | 32  | 468  |
| LSC.gene83.rps19   | 0.01147 | 9   | 279  |
| LSC.gene9.trnS-GCU | 0       | 0   | 88   |
| SSC.gene1.ndhF     | 0.01511 | 88  | 2223 |
| SSC.gene10.ndhA    | 0.01258 | 38  | 1092 |
| SSC.gene11.ndhH    | 0.01359 | 39  | 1182 |
| SSC.gene12.rps15   | 0.01515 | 10  | 264  |
| SSC.gene13.ycf1    | 0.04246 | 435 | 5736 |
| SSC.gene2.rpl32    | 0.01341 | 6   | 169  |
| SSC.gene3.trnL-UAG | 0.00667 | 1   | 80   |
| SSC.gene4.ccsA     | 0.01663 | 43  | 942  |
| SSC.gene5.ndhD     | 0.01373 | 51  | 1521 |
| SSC.gene6.psaC     | 0.00759 | 4   | 246  |
| SSC.gene7.ndhE     | 0.01394 | 11  | 321  |
| SSC.gene8.ndhG     | 0.01042 | 14  | 531  |
| SSC.gene9.ndhI     | 0.0157  | 21  | 504  |

---
